# Supplementary material for: Design, Synthesis, and Biological Activity of New CB2 Receptor Ligands: from Orthosteric and Allosteric Modulators to Dualsteric/Bitopic Ligands
Source: PubMed Central journal article supplement (PMC10168668; doi:10.1021/acs.jmedchem.2c00582), 2022-07-18

# Supporting Information

## Design, synthesis and biological activity of new CB2 receptor ligands: from orthosteric and allosteric modulators to dualsteric/bitopic ligands

*Francesca Gado,<sup>1,#,¥</sup> Rebecca Ferrisi,<sup>1,#</sup> Beatrice Polini,<sup>1,2</sup> Kawthar A. Mohamed,<sup>3</sup> Caterina Ricardi,<sup>2</sup>*

*Elena Lucarini,<sup>4</sup> Sara Carpi,<sup>1,5</sup> Federica Domenichini,<sup>1</sup> Lesley A. Stevenson,<sup>6</sup>*

*Simona Rapposelli,<sup>1,7</sup> Giuseppe Saccomanni,<sup>1</sup> Paola Nieri,<sup>1</sup> Gabriella Ortore,<sup>1</sup>*

*Roger G. Pertwee,<sup>6</sup> Carla Ghelardini,<sup>4</sup> Lorenzo Di Cesare Mannelli,<sup>4</sup>*

*Grazia Chiellini,<sup>2,7\*</sup> Robert B. Laprairie,<sup>3,8\*</sup> Clementina Manera<sup>1,7,\*</sup>*

<sup>1</sup>Department of Pharmacy, University of Pisa, 56126 Pisa, Italy;

<sup>2</sup>Department of Pathology, University of Pisa, 56126 Pisa, Italy;

<sup>3</sup>College of Pharmacy and Nutrition, University of Saskatchewan, Saskatoon, SK S7N 5E5, Canada.

<sup>4</sup>Department of Neuroscience, Psychology, Drug Research and Child Health, Section of Pharmacology and Toxicology, University of Florence, 50139 Florence, Italy.

<sup>5</sup>NEST, Istituto Nanoscienze-CNR and Scuola Normale Superiore, Piazza San Silvestro 56126 Pisa, Italy.

<sup>6</sup>Institute of Medical Sciences, University of Aberdeen, AB25 2ZD Aberdeen, Scotland, UK;

<sup>7</sup>CISUP, Centre for Instrumentation Sharing Pisa University, Lungarno Pacinotti 43, 56126 Pisa, Italy;

<sup>8</sup>Department of Pharmacology, College of Medicine, Dalhousie University, Halifax, Nova Scotia, B3H 4R2, Canada.

## Corresponding Authors

\*Clementina Manera: [clementina.manera@unipi.it](mailto:clementina.manera@unipi.it);

\*Robert B. Laprairie: [robert.laprairie@usask.ca](mailto:robert.laprairie@usask.ca);

\*Grazia Chiellini: [grazia.chiellini@unipi.it](mailto:grazia.chiellini@unipi.it)

## CONTENTS OF SUPPORTING INFORMATION

S3 **Extended Data Table S1. Statistics for inhibition of forskolin-stimulated cAMP and  $\beta$ arrestin2 recruitment.**

S4 **Extended Data Table S2. Statistics for inhibition of forskolin-stimulated cAMP.**

S5 **Extended Data Table S3. Statistics for [<sup>3</sup>H]CP55,940 binding  $E_{min}$ .; Extended Data Table S4. Statistics for forskolin-stimulated cAMP.**

S6, S7 **Extended Data Table S5. Statistics for Behavioral Tests performed in vivo.**

S7 **Figure S1: FM-6b, EC-21a, FD-22a, and FD-24a inhibit cAMP accumulation in CHO cells lacking CB2R**

S8 **Figure S2. Summary of receptor cavities**

S8 **Figure S2. EC-21a docking.**

S9 **Figure S3. Docking of FD-compounds**

S9 **Figure S4. Comparison between the potential CB2R allosteric region with the superimposed CBR1**

S10-S18 **<sup>1</sup>H- and <sup>13</sup>C-NMR Spectra of compounds FD-22a, FD-24a, FD-25a, FD-30a FD-27a FD-28a, FD-32a and FD-31a and HPLC chromatogram of FD-22a**

**Extended Data Table S1. Statistics for inhibition of forskolin-stimulated cAMP and  $\beta$ arrestin2 recruitment.**

|                                                                                  | <b>ANOVA</b>        | <b>F(DFn,DFd)</b>       | <b>p value</b> |
|----------------------------------------------------------------------------------|---------------------|-------------------------|----------------|
| <b>Figure 2</b>                                                                  | ME Drug             | F(7,80)=113.0           | < 0.0001       |
|                                                                                  | ME Assay            | F(1,80)=3.248           | < 0.0001       |
|                                                                                  | INT                 | F(7,80)=17.39           | < 0.0001       |
| <b>Inhibition of FSK-stimulated cAMP (% CP55,940) <math>E_{max}</math></b>       |                     |                         |                |
| <b>Figure 2a,b</b>                                                               | <b>Comparison</b>   | <b>Adjusted p value</b> |                |
|                                                                                  | CP55,940 vs. EC-21a | < 0.0001                |                |
|                                                                                  | CP55,940 vs. FM-6b  | 0.0001                  |                |
|                                                                                  | CP55,940 vs. FD-22a | < 0.0001                |                |
|                                                                                  | CP55,940 vs. FD-24a | < 0.0001                |                |
|                                                                                  | CP55,940 vs. FD-25a | < 0.0001                |                |
|                                                                                  | CP55,940 vs. FD-27a | < 0.0001                |                |
|                                                                                  | CP55,940 vs. FD-32a | < 0.0001                |                |
| <b><math>\beta</math>arrestin2 recruitment (% CP55,940) <math>E_{max}</math></b> |                     |                         |                |
| <b>Figure 2c,d</b>                                                               | <b>Comparison</b>   | <b>Adjusted p value</b> |                |
|                                                                                  | CP55,940 vs. EC-21a | < 0.0001                |                |
|                                                                                  | CP55,940 vs. FM-6b  | < 0.0001                |                |
|                                                                                  | CP55,940 vs. FD-22a | < 0.0001                |                |
|                                                                                  | CP55,940 vs. FD-24a | < 0.0001                |                |
|                                                                                  | CP55,940 vs. FD-25a | < 0.0001                |                |
|                                                                                  | CP55,940 vs. FD-27a | < 0.0001                |                |
|                                                                                  | CP55,940 vs. FD-32a | < 0.0001                |                |

CB2R activity was quantified for cAMP inhibition using the DiscoverX HitHunter assay (CHO *hCB2R*) in cells treated with compounds for 90 min, and for  $\beta$ arrestin2 recruitment using the DiscoverX PathHunter assay (CHO *hCB2R*) in cells treated with compounds for 90 min. Data were fit to a variable slope (three-parameter) non-linear regression in GraphPad (v. 9). Data for  $EC_{50}$  were analyzed by mean with 95% confidence interval (C.I.) and assessed by non-overlapping 95% C.I. (Table 1, no further analysis here). Data for  $E_{max}$  were analyzed by mean  $\pm$  S.E.M. with two-way ANOVA followed by Dunnett's post-hoc test (within assay). n = 6 independent experiments performed in triplicate. Data from this Table are graphed in Figure 2 and presented in Table 1.

**Extended Data Table S2. Statistics for inhibition of forskolin-stimulated cAMP.**

|                                                                            | ANOVA                                 | F(DFn,DFd)              | p value  |
|----------------------------------------------------------------------------|---------------------------------------|-------------------------|----------|
| <b>Figure 3</b>                                                            | ME Treatment                          | F(9,35)=19.94           | < 0.0001 |
| <b>Inhibition of FSK-stimulated cAMP (% CP55,940) <math>E_{max}</math></b> |                                       |                         |          |
| <b>Figure 3</b>                                                            | <b>Comparison</b>                     | <b>Adjusted p value</b> |          |
|                                                                            | CP55,940 vs. FM-6b                    | 0.209                   |          |
|                                                                            | CP55,940 vs. EC-21a                   | < 0.0001                |          |
|                                                                            | CP55,940 vs. 10 nM FM-6b + EC-21a     | 0.0087                  |          |
|                                                                            | CP55,940 vs. FD-22a                   | 0.0002                  |          |
|                                                                            | CP55,940 vs. 50 nM FD-22a + EC-21a    | < 0.0001                |          |
|                                                                            | CP55,940 vs. 100 nM SR144528 + FD-22a | < 0.0001                |          |
|                                                                            | CP55,940 vs. FD-24a                   | < 0.0001                |          |
|                                                                            | CP55,940 vs. 5 nM FD-24a + EC-21a     | 0.9808                  |          |
|                                                                            | CP55,940 vs. 100 nM SR144528 + FD-24a | < 0.0001                |          |
|                                                                            | FM-6b vs. EC-21a                      | < 0.0001                |          |
|                                                                            | FM-6b vs. 10 nM FM-6b + EC-21a        | 0.7043                  |          |
|                                                                            | FM-6b vs. FD-22a                      | 0.209                   |          |
|                                                                            | FM-6b vs. 50 nM FD-22a + EC-21a       | 0.0004                  |          |
|                                                                            | FM-6b vs. 100 nM SR144528 + FD-22a    | 0.0459                  |          |
|                                                                            | FM-6b vs. FD-24a                      | 0.0046                  |          |
|                                                                            | FM-6b vs. 5 nM FD-24a + EC-21a        | 0.9808                  |          |
|                                                                            | FM-6b vs. 100 nM SR144528 + FD-24a    | 0.0041                  |          |
|                                                                            | EC-21a vs. 10 nM FM-6b + EC-21a       | 0.0007                  |          |
|                                                                            | EC-21a vs. FD-22a                     | 0.0001                  |          |
|                                                                            | EC-21a vs. 50 nM FD-22a + EC-21a      | 0.8329                  |          |
|                                                                            | EC-21a vs. 100 nM SR144528 + FD-22a   | 0.0512                  |          |
|                                                                            | EC-21a vs. FD-24a                     | 0.01                    |          |
|                                                                            | EC-21a vs. 5 nM FD-24a + EC-21a       | < 0.0001                |          |
|                                                                            | EC-21a vs. 100 nM SR144528 + FD-24a   | 0.3329                  |          |

CB2R activity was quantified for cAMP inhibition using the DiscoverX HitHunter assay (CHO *hCB2R*) in cells treated with compounds for 90 min. Data were fit to a variable slope (three-parameter) non-linear regression in GraphPad (v. 9). Data for  $EC_{50}$  were analyzed by mean with 95% confidence interval (C.I.) and assessed by non-overlapping 95% C.I. (Table 2, no further analysis here). Data for  $E_{max}$  were analyzed by mean  $\pm$  S.E.M. with one-way ANOVA followed by Tukey's post-hoc test. n = 3-6 independent experiments performed in triplicate. Data from this Table are graphed in Figure 3 and presented in Table 2.

**Extended Data Table S3. Statistics for [<sup>3</sup>H]CP55,940 binding  $E_{\min}$ .**

|                                                                                                         | ANOVA               | F(DFn,DFd)              | p value  |
|---------------------------------------------------------------------------------------------------------|---------------------|-------------------------|----------|
| <b>Figure 4</b>                                                                                         | ME Drug             | F(4,20)=128.8           | < 0.0001 |
|                                                                                                         | ME Receptor         | F(1,20)=20.14           | 0.0002   |
|                                                                                                         | INT                 | F(4,20)=15.05           | < 0.0001 |
| <b>[<sup>3</sup>H]CP55,940 binding at hCB1R (% [<sup>3</sup>H]CP55,940 bound) <math>E_{\min}</math></b> |                     |                         |          |
| <b>Figure 4A</b>                                                                                        | <b>Comparison</b>   | <b>Adjusted p value</b> |          |
|                                                                                                         | CP55,940 vs. EC-21a | < 0.0001                |          |
|                                                                                                         | CP55,940 vs. FM-6b  | 0.0064                  |          |
|                                                                                                         | CP55,940 vs. FD-22a | < 0.0001                |          |
|                                                                                                         | CP55,940 vs. FD-24a | < 0.0001                |          |
| <b>[<sup>3</sup>H]CP55,940 binding at hCB2R (% [<sup>3</sup>H]CP55,940 bound) <math>E_{\min}</math></b> |                     |                         |          |
| <b>Figure 4B</b>                                                                                        | <b>Comparison</b>   | <b>Adjusted p value</b> |          |
|                                                                                                         | CP55,940 vs. EC-21a | < 0.0001                |          |
|                                                                                                         | CP55,940 vs. FM-6b  | 0.3338                  |          |
|                                                                                                         | CP55,940 vs. FD-22a | 0.0003                  |          |
|                                                                                                         | CP55,940 vs. FD-24a | < 0.0001                |          |

[<sup>3</sup>H]CP55,940 binding to CB1R and CB2R from CHO-K1 cells were quantified as described in Figure 4 and Table 3. Data were fit to a variable slope (three-parameter) non-linear regression in GraphPad (v. 9). Data for  $K_i$  were analyzed by mean with 95% confidence interval (C.I.) and assessed by non-overlapping 95% C.I. (Table 3, no further analysis here). Data for  $E_{\min}$  were analyzed by mean  $\pm$  S.E.M. with two-way ANOVA followed by Dunnett's post-hoc test (within assay). n = 3 independent experiments performed in duplicate. Data from this Table are graphed in Figure 4 and presented in Table 3.

**Extended Data Table S4. Statistics for forskolin-stimulated cAMP.**

|                                                                                                         | ANOVA                         | F(DFn,DFd)              | p value  |
|---------------------------------------------------------------------------------------------------------|-------------------------------|-------------------------|----------|
| <b>Figure 4</b>                                                                                         | ME Treatment                  | F(6,21)=434.2           | < 0.0001 |
|                                                                                                         | Residual                      | 21                      |          |
| <b>[<sup>3</sup>H]CP55,940 binding at hCB1R (% [<sup>3</sup>H]CP55,940 bound) <math>E_{\min}</math></b> |                               |                         |          |
| <b>Figure 4A</b>                                                                                        | <b>Comparison</b>             | <b>Adjusted p value</b> |          |
|                                                                                                         | +10 $\mu$ M FSK vs. Untreated | < 0.0001                |          |
|                                                                                                         | +10 $\mu$ M FSK vs. CP55,940  | 0.9593                  |          |
|                                                                                                         | +10 $\mu$ M FSK vs. FM-6b     | < 0.0001                |          |
|                                                                                                         | CP55,940 vs. FD-22a           | < 0.0001                |          |
|                                                                                                         | CP55,940 vs. FD-24a           | < 0.0001                |          |

cAMP accumulation was quantified using the DiscoverX HitHunter assay (CHO-K1 cells) in cells treated with compounds for 90 min. Data were analyzed in GraphPad (v. 9). Data are mean  $\pm$  S.E.M. with one-way ANOVA followed by Dunnett's post-hoc test. n = 4 independent experiments performed in triplicate. Data from this Table are graphed in Figure S1.

**Extended Data Table S5. Statistics for Behavioral Tests performed in vivo.**

| <b>Fig. 9</b>  | <b>Experimental groups comparison</b>                                                             | <b>Time (min)</b> | <b>p value</b> |
|----------------|---------------------------------------------------------------------------------------------------|-------------------|----------------|
|                | vehicle + vehicle vs oxaliplatin + vehicle                                                        | 0                 | 0.00134        |
|                |                                                                                                   | 15                | < 0.0001       |
|                |                                                                                                   | 30                | < 0.0001       |
|                |                                                                                                   | 45                | < 0.0001       |
|                |                                                                                                   | 60                | < 0.0001       |
|                |                                                                                                   | 75                | < 0.0001       |
|                | oxaliplatin + vehicle vs oxaliplatin + FD22a 1 mg kg <sup>-1</sup>                                | 0                 | 0.83272        |
|                |                                                                                                   | 15                | 0.80277        |
|                |                                                                                                   | 30                | 0.2073         |
|                |                                                                                                   | 45                | 0.3597         |
|                |                                                                                                   | 60                | 0.22678        |
|                |                                                                                                   | 75                | 0.73019        |
|                | oxaliplatin + vehicle vs oxaliplatin + FD22a 5 mg kg <sup>-1</sup>                                | 0                 | 0.44584        |
|                |                                                                                                   | 15                | 0.03184        |
|                |                                                                                                   | 30                | 0.00116        |
|                |                                                                                                   | 45                | 0.00193        |
|                |                                                                                                   | 60                | 0.1525         |
|                |                                                                                                   | 75                | 0.80889        |
|                | oxaliplatin + vehicle vs oxaliplatin + FD22a 20 mg kg <sup>-1</sup>                               | 0                 | 0.88519        |
|                |                                                                                                   | 15                | 0.04099        |
|                |                                                                                                   | 30                | 0.00462        |
|                |                                                                                                   | 45                | 0.00278        |
|                |                                                                                                   | 60                | 0.02878        |
|                |                                                                                                   | 75                | 0.70909        |
| <b>Fig. 10</b> | vehicle + vehicle vs oxaliplatin + FD22a 20 mg kg <sup>-1</sup> + MC21a 10 mg kg <sup>-1</sup>    | 0                 | < 0.0001       |
|                |                                                                                                   | 15                | 0.00078        |
|                |                                                                                                   | 30                | < 0.0001       |
|                |                                                                                                   | 45                | < 0.0001       |
|                |                                                                                                   | 60                | 0.00154        |
|                |                                                                                                   | 75                | < 0.0001       |
|                | vehicle + vehicle vs oxaliplatin + FD22a 20 mg kg <sup>-1</sup> + SR144428 10 mg kg <sup>-1</sup> | 0                 | 0.00534        |
|                |                                                                                                   | 15                | < 0.0001       |
|                |                                                                                                   | 30                | 0.00138        |

|    |          |
|----|----------|
| 45 | < 0.0001 |
| 60 | < 0.0001 |
| 75 | < 0.0001 |

Data were analyzed by mean  $\pm$  S.E.M. with one-way ANOVA followed by Bonferroni's posthoc test. Each value represents the mean of 16 mice per group, performed in 2 different experimental sets. The table is graphed in Figures 9 and 10.

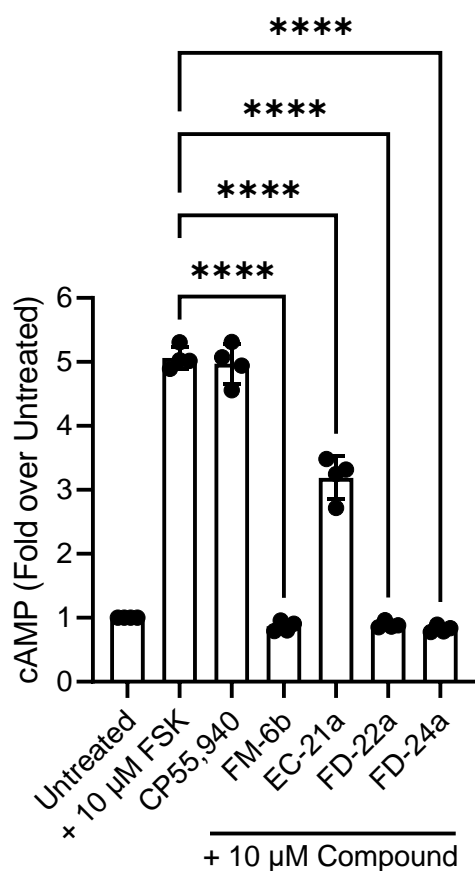

**Figure S1:** FM-6b, EC-21a, FD-22a, and FD-24a inhibit cAMP accumulation in CHO cells lacking CB2R. Inhibition of FSK-stimulated cAMP accumulation in CHO-K1 cells lacking CB2R. cAMP accumulation data are expressed as fold over untreated cells. Cells were treated with 10  $\mu$ M FSK and 10  $\mu$ M compounds simultaneously as indicated. Data are mean  $\pm$  S.E.M. of 4 independent experiments performed in triplicate. Statistical data for these graphs are presented in Table S4.

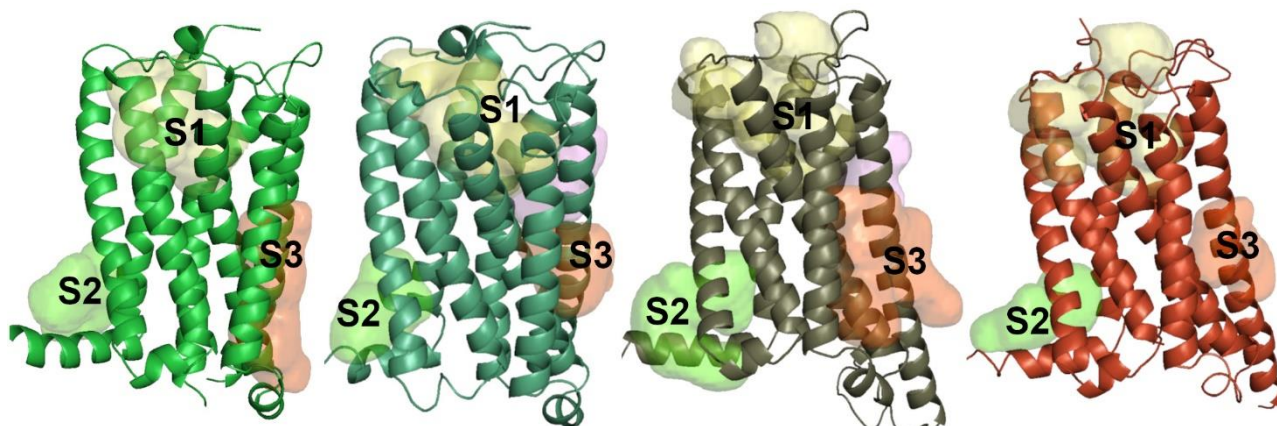

**Figure S2:** Summary of receptor cavities predicted by Flap program in 5ZTY structure (light green, inactive form), 6KPC (dark green, agonist-bound form), 6PT0 (grey, agonist and Gi-bound complex) and 6KPF (brown, agonist and Gi-bound complex).

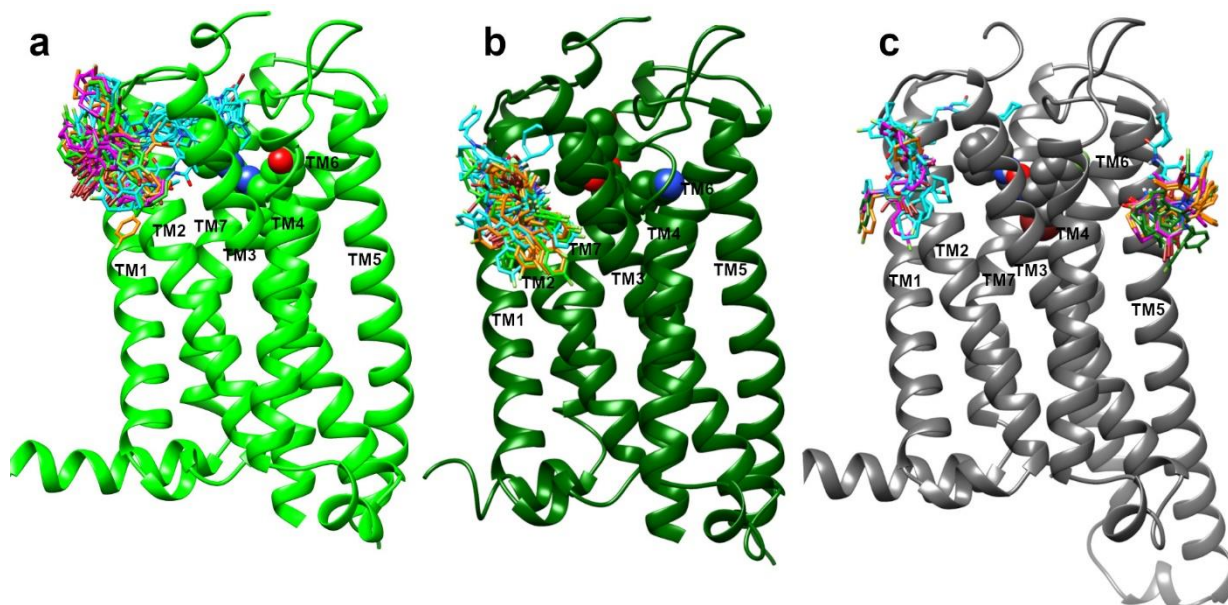

**Figure S3:** Results of EC-21a docking in 5ZTY (a), 6KPC (b) and 6PT0 (c) structures calculated using all GOLD scoring functions: ASP (orange colored), GOLDScore (cyan colored), CHEMSCORE (green colored) and PLP (magenta colored)



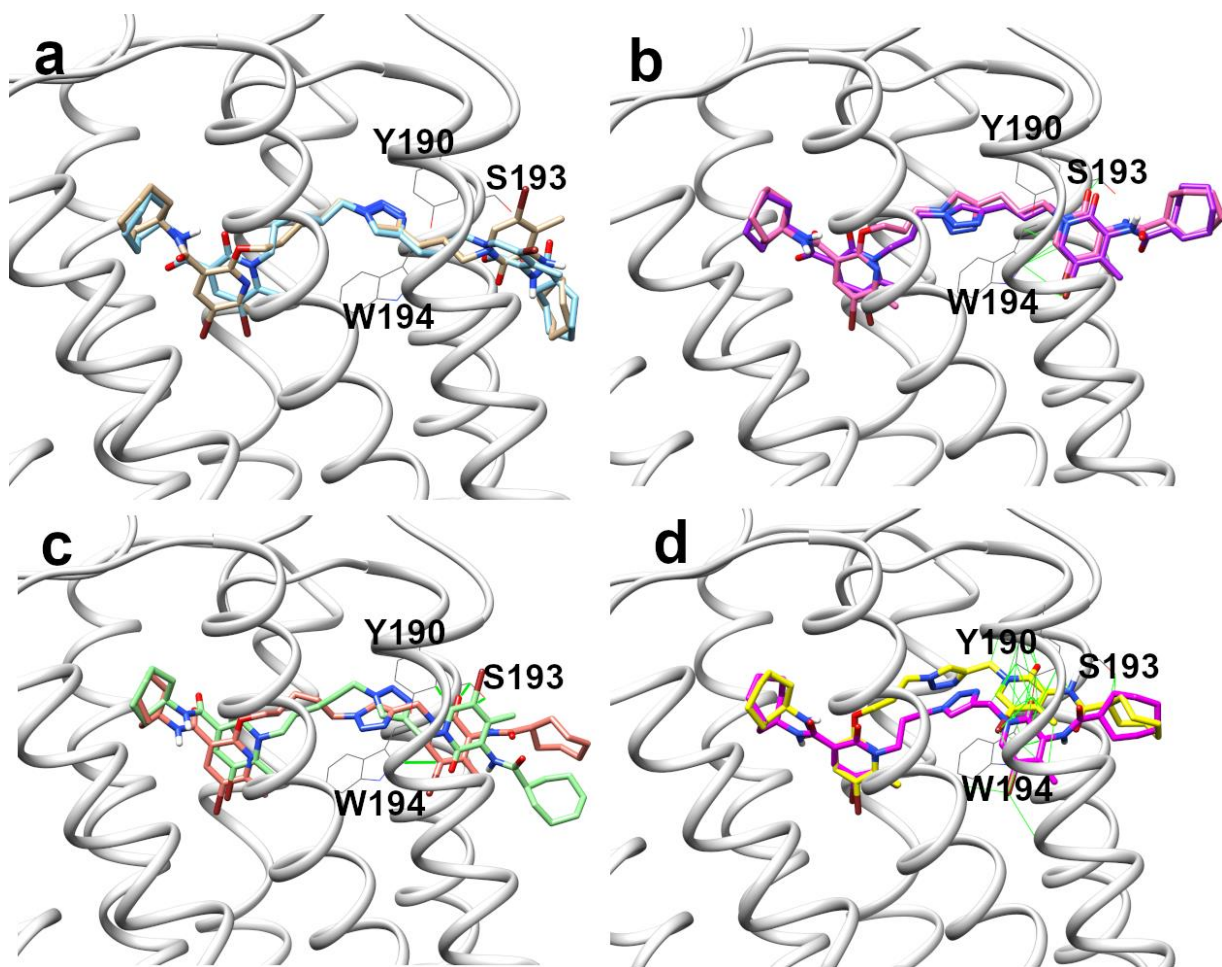

**Figure S4.** Docking of a) **FD-22a** (light cyan) and **FD-24a** (beige); b) **FD-25a** (purple) and **FD-30a** (pink); c) **FD-27a** (light green) and **FD-28a** (salmon); d) **FD-31a** (yellow) and **FD-32a** (magenta) in 6PT0 structure. Clashes are reported as green lines.

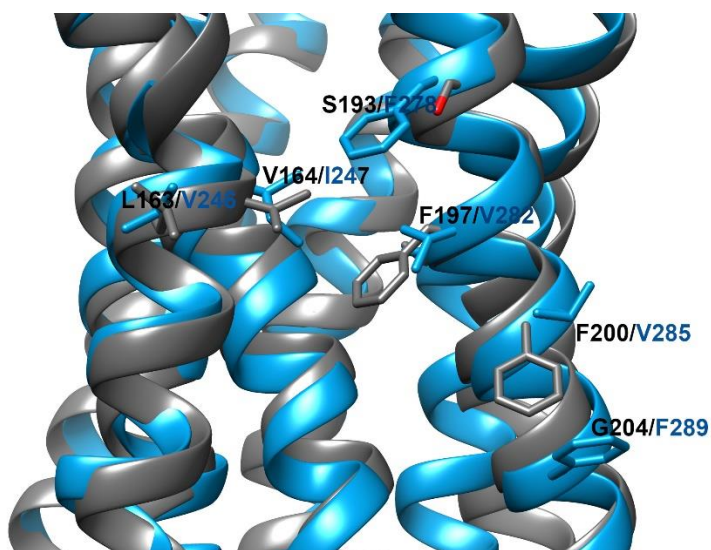

**Figure S5.** Comparison between the potential allosteric region of CB2R (grey colored) with the superimposed CBR1 (blue colored): non conserved residues are highlighted with analogous colors.

<sup>1</sup>H-, <sup>13</sup>C-NMR Spectra of compounds **FD-22a**, **FD-24a**, **FD-25a**, **FD-30a** **FD-27a** **FD-28a**, **FD-32a** and **FD-31a** and HPLC chromatogram of **FD-22a**

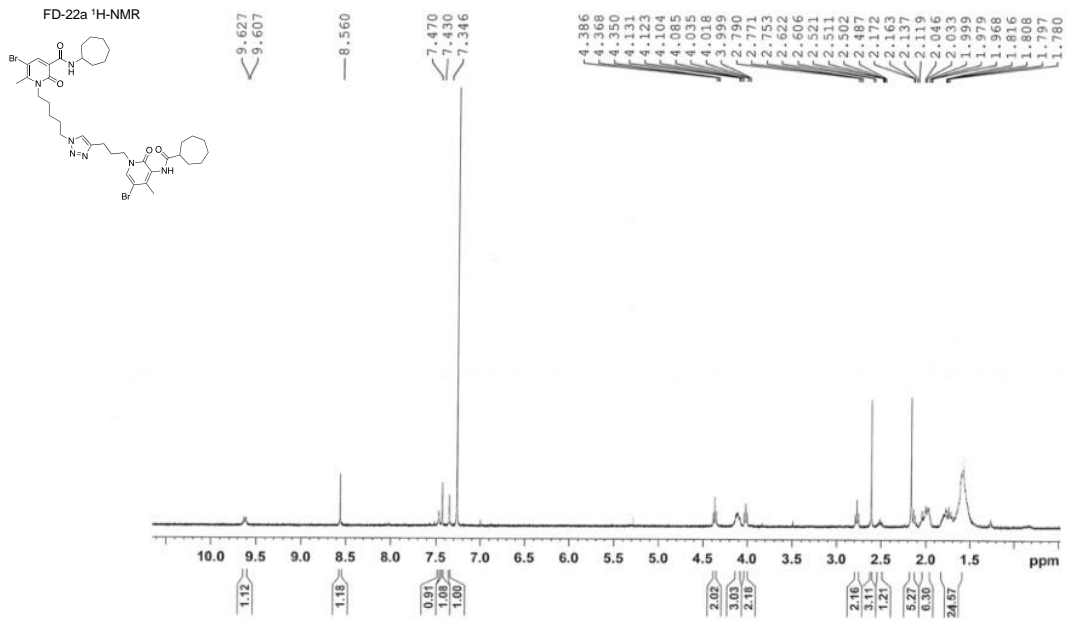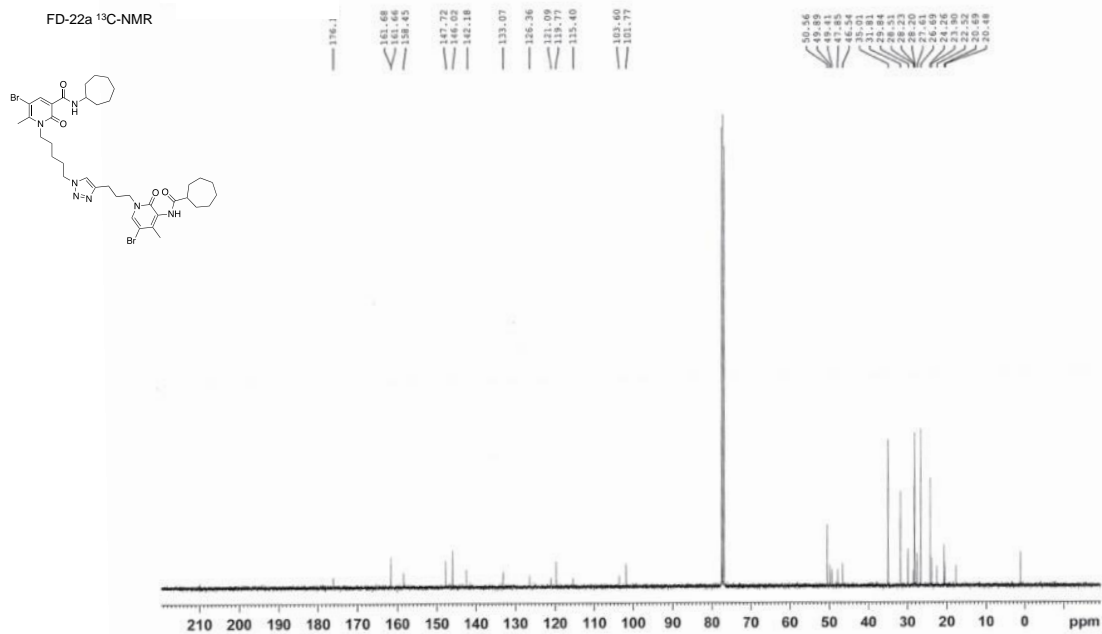

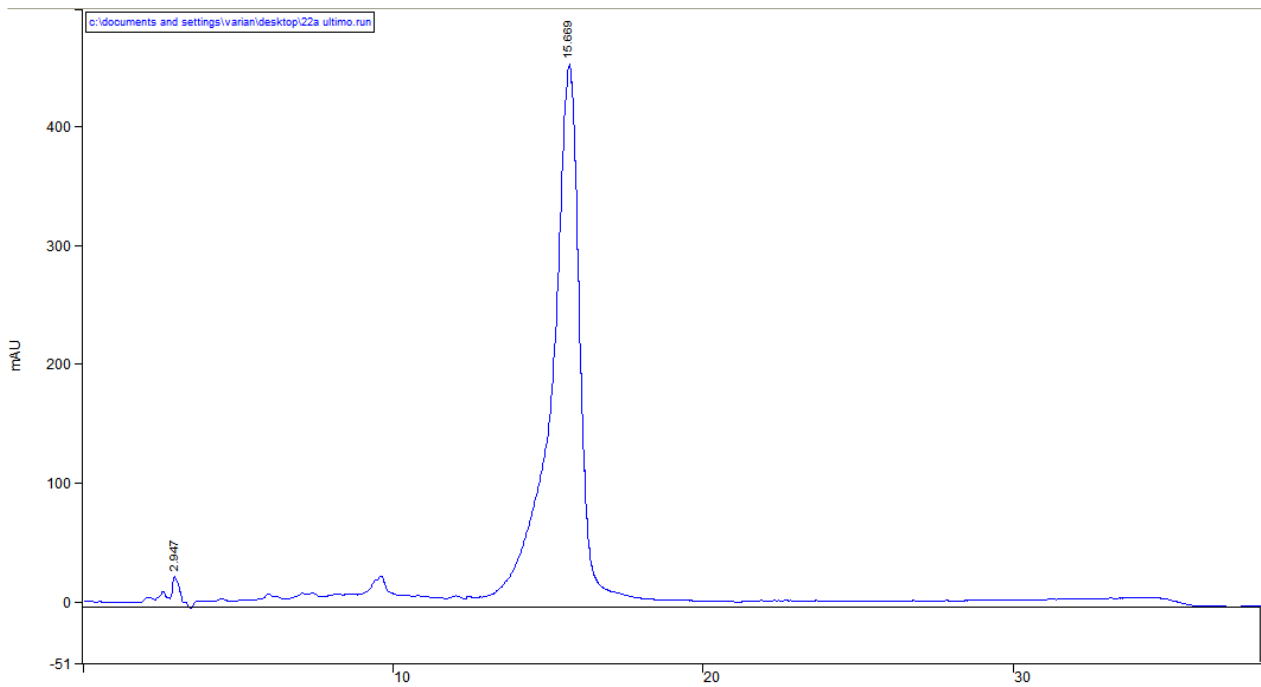

Operator : Detector Type: 330 UV-Vis. PDA  
 Workstation: HPLC Bus Address : 71  
 Instrument : Varian Star #1 Sample Rate : 0.63 Hz  
 Channel : 1 = 220.00 nm Run Time : 51.013 min

\*\* LC Workstation Version 6.41 \*\* 01938-61c0-aa4-04b0 \*\*

Run Mode : Analysis  
 Peak Measurement: Peak Area  
 Calculation Type: Percent

| Peak No. | Peak Name | Result (%) | Ret. Time (min) | Time Offset (min) | Area (counts) | Sep. Code | 1/2 (sec) | Status Codes |
|----------|-----------|------------|-----------------|-------------------|---------------|-----------|-----------|--------------|
| 1        |           | 1.1598     | 2.947           | 0.000             | 1630791       | BB        | 13.3      |              |
| 2        |           | 98.8402    | 15.669          | 0.000             | 138984480     | BB        | 46.9      |              |
| Totals:  |           | 100.0000   |                 | 0.000             | 140615271     |           |           |              |

FD-24a <sup>1</sup>H-NMR

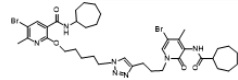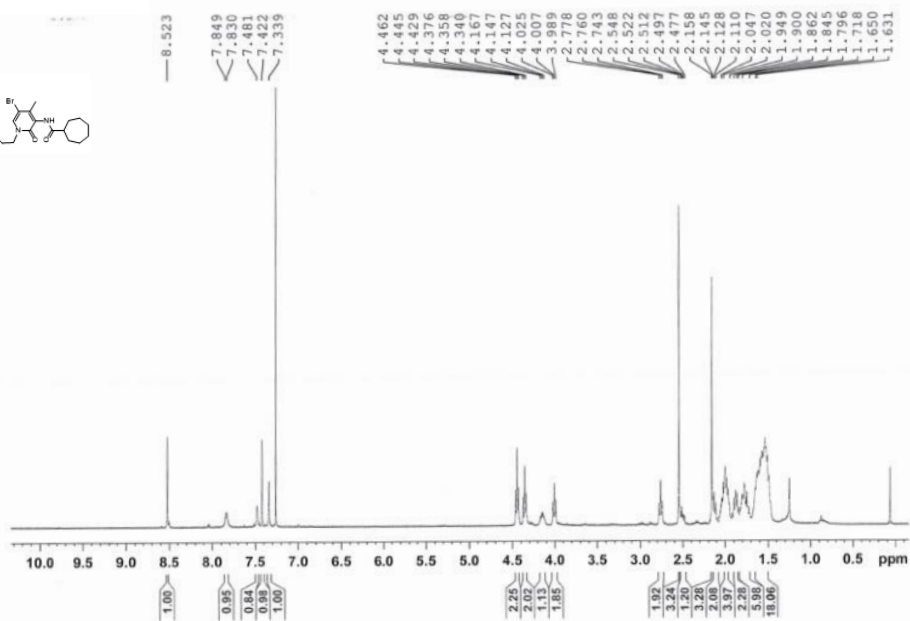

FD-24a <sup>13</sup>C-NMR

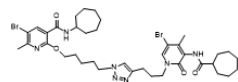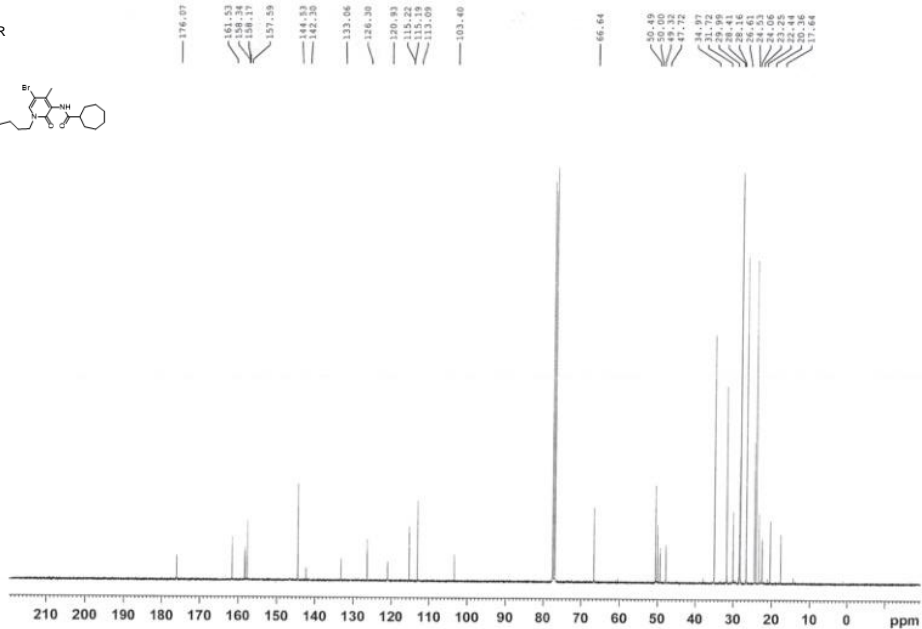

FD-25a <sup>1</sup>H-NMR

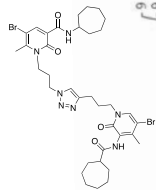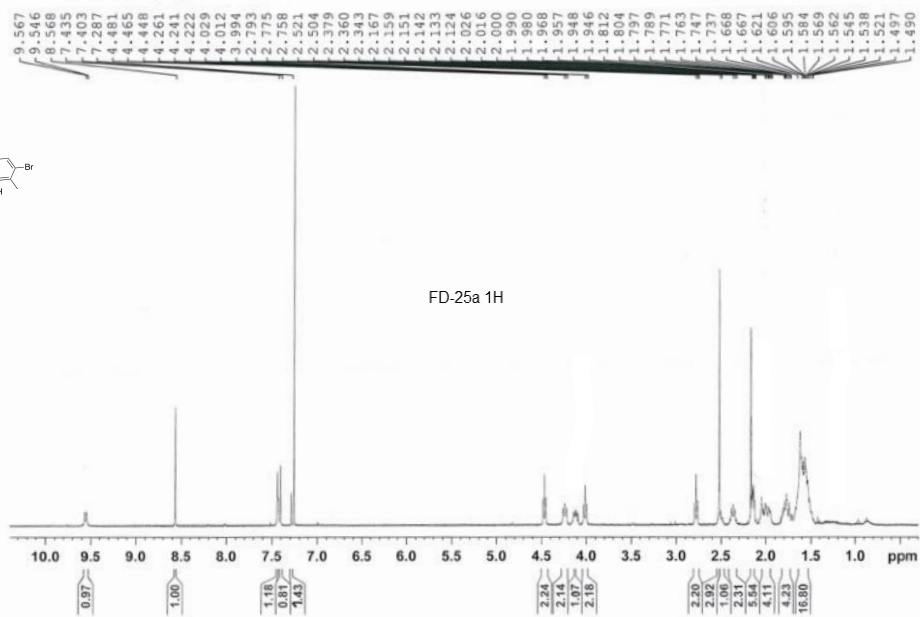

FD-25a <sup>13</sup>C-NMR

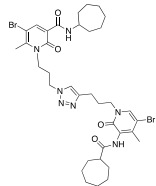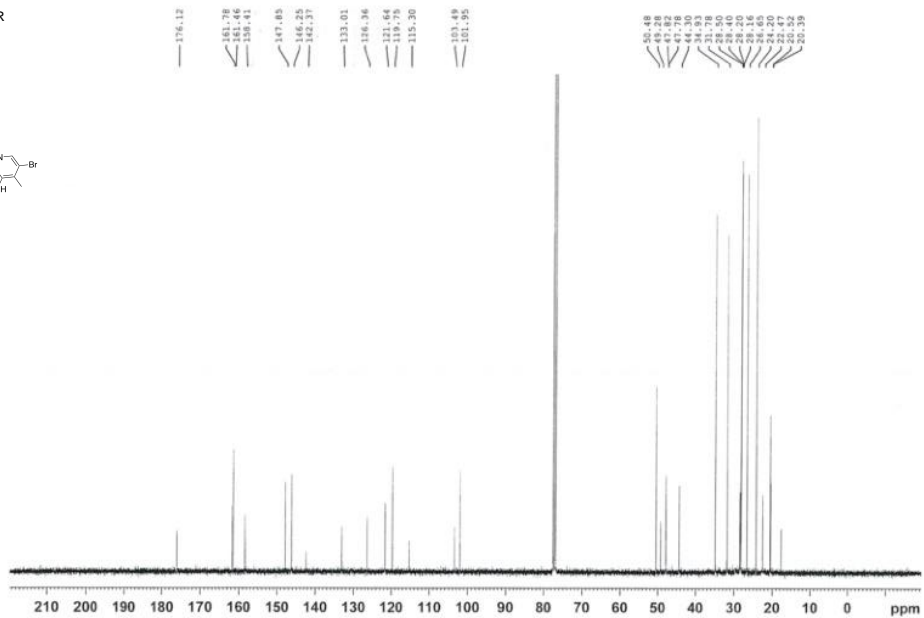

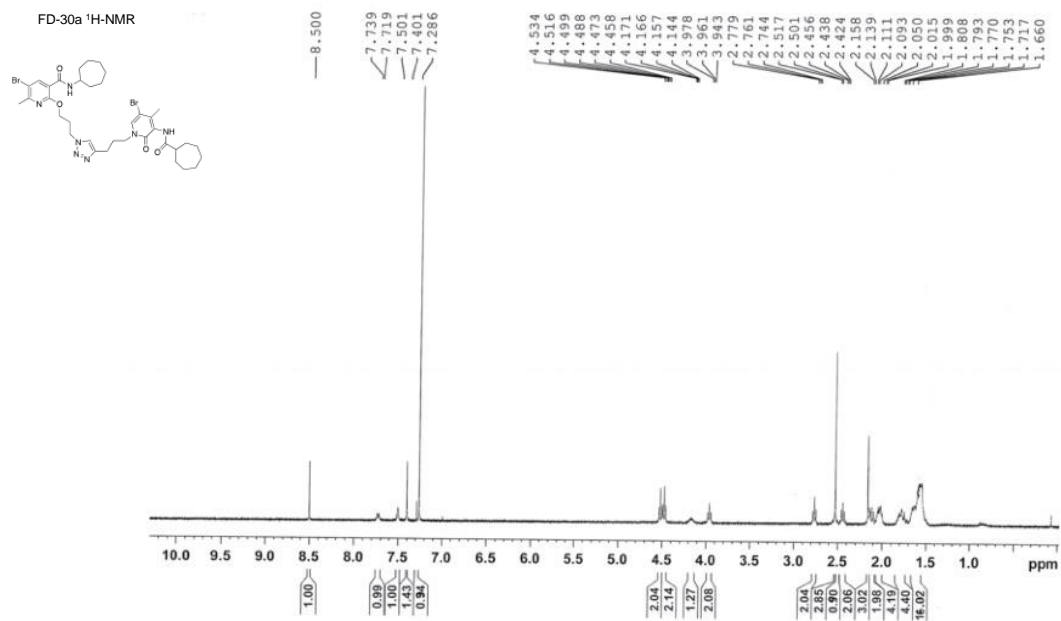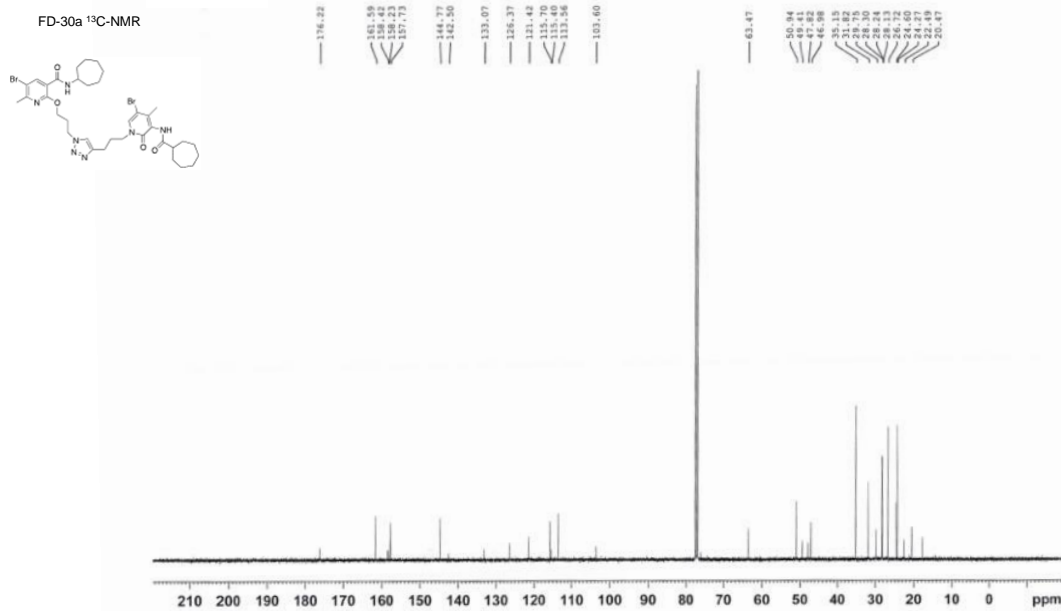

FD-27a <sup>1</sup>H-NMR

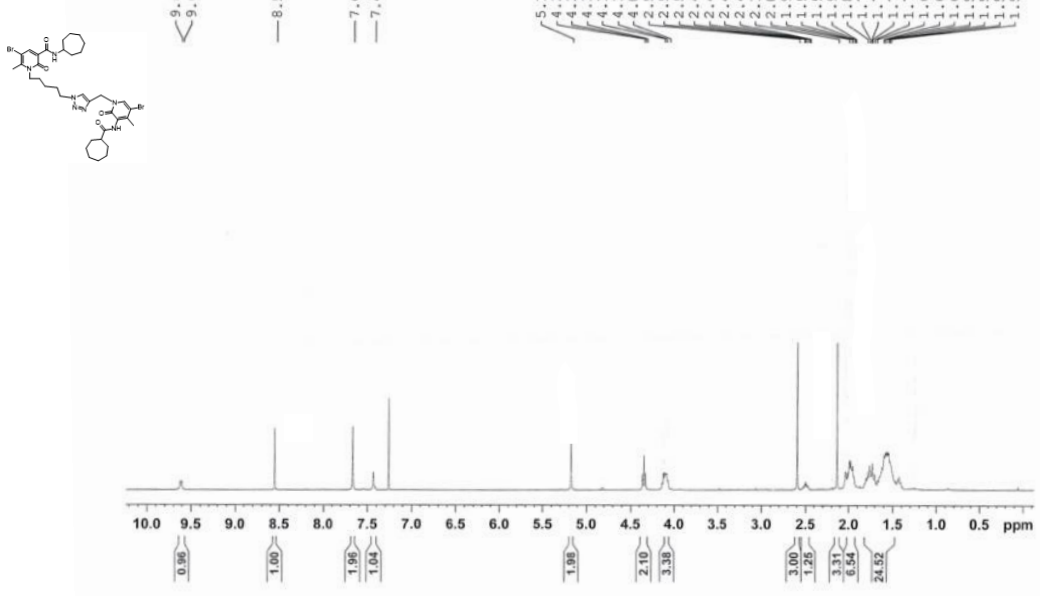

FD-27a <sup>13</sup>C-NMR

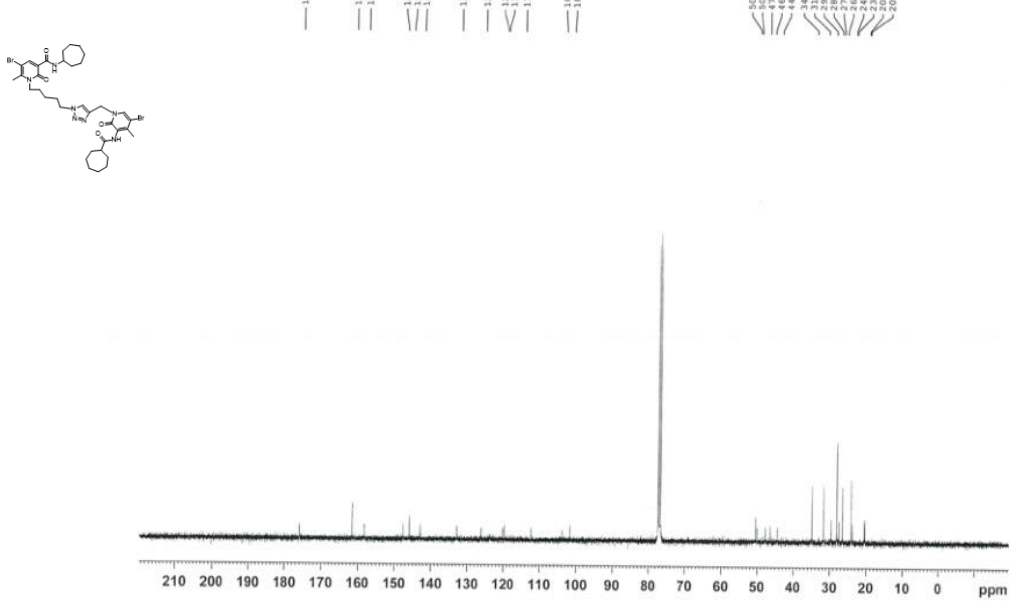

FD-28a <sup>1</sup>H-NMR

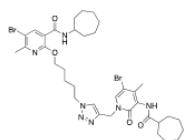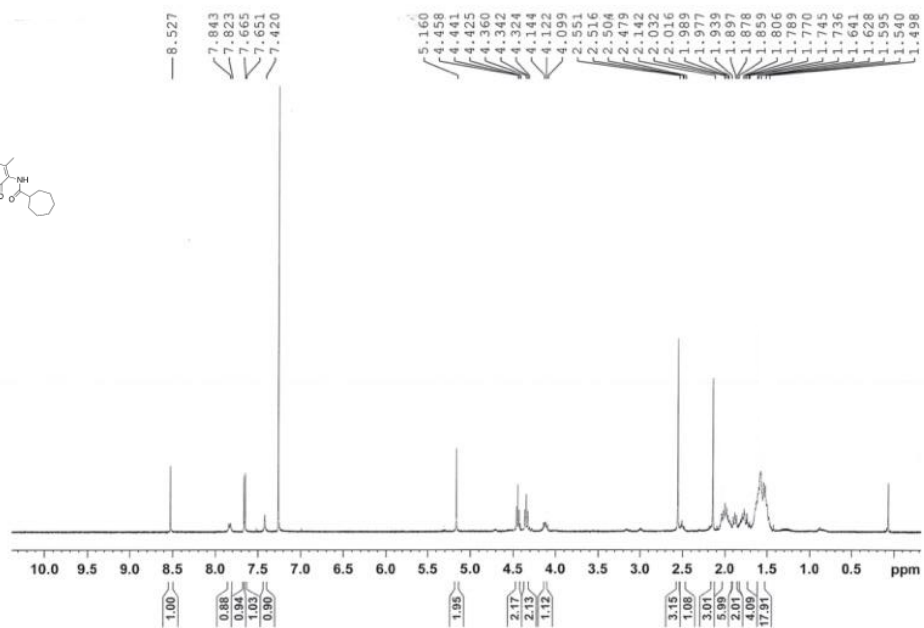

FD-28a <sup>13</sup>C-NMR

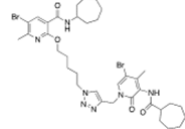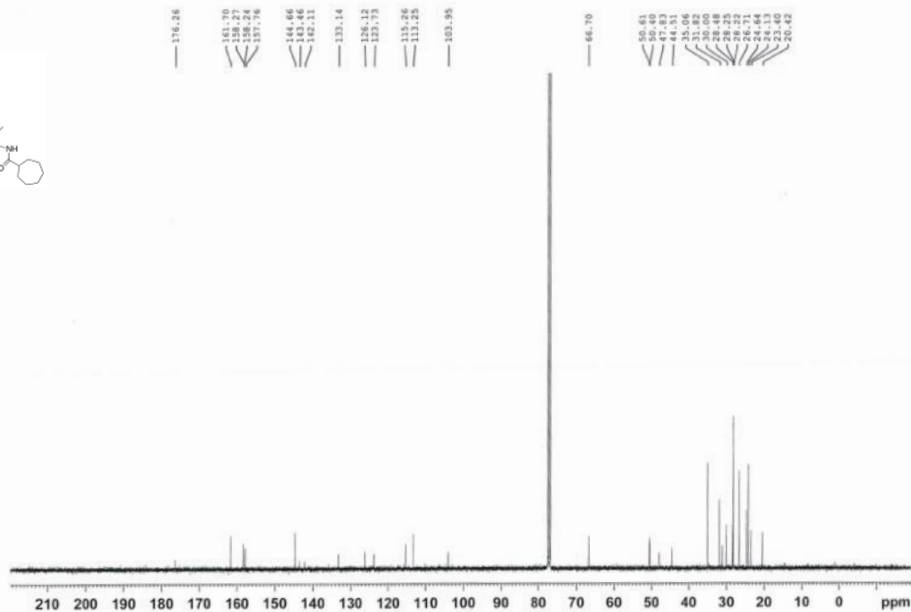



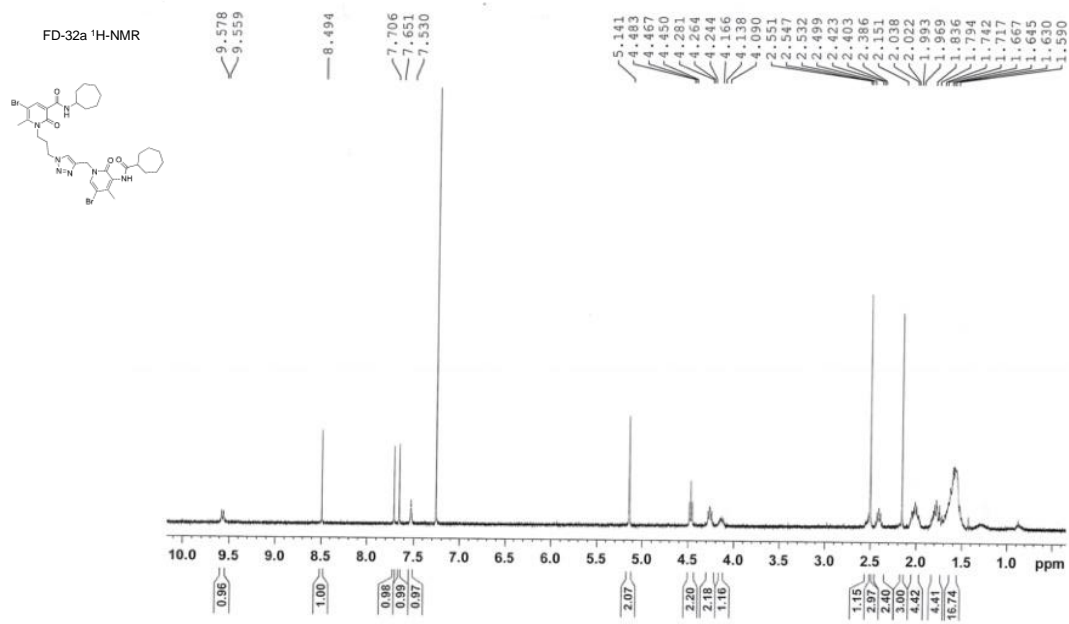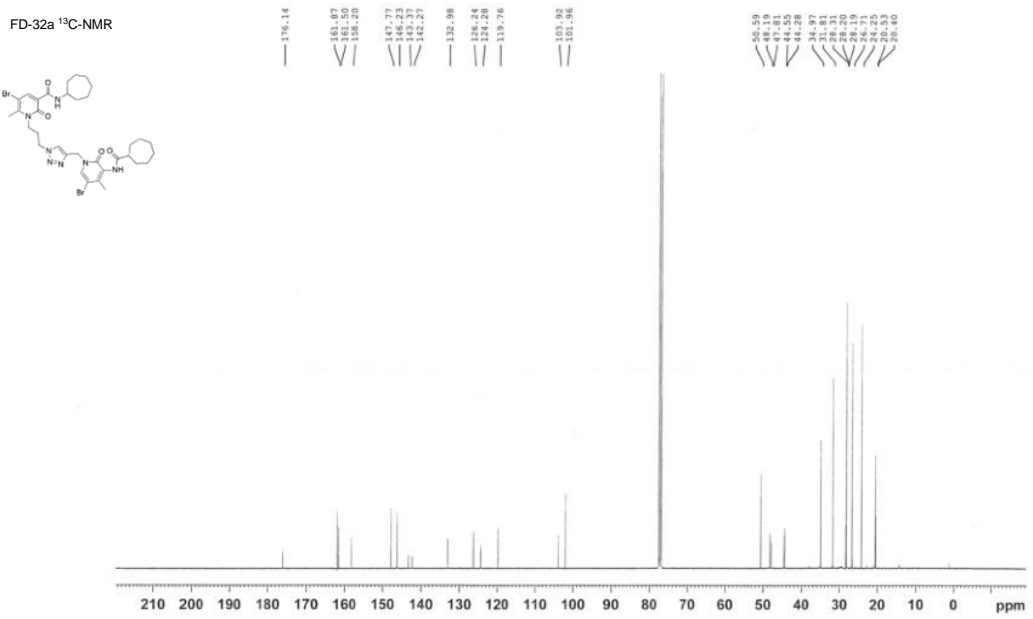

FD-31a <sup>1</sup>H-NMR

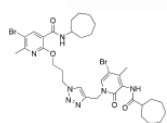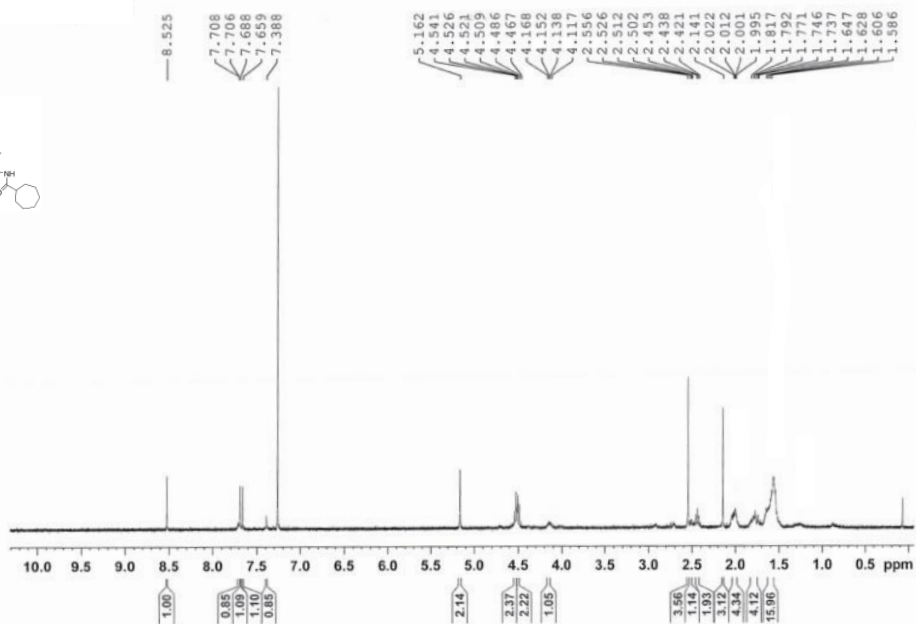

FD-31a <sup>13</sup>C-NMR

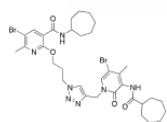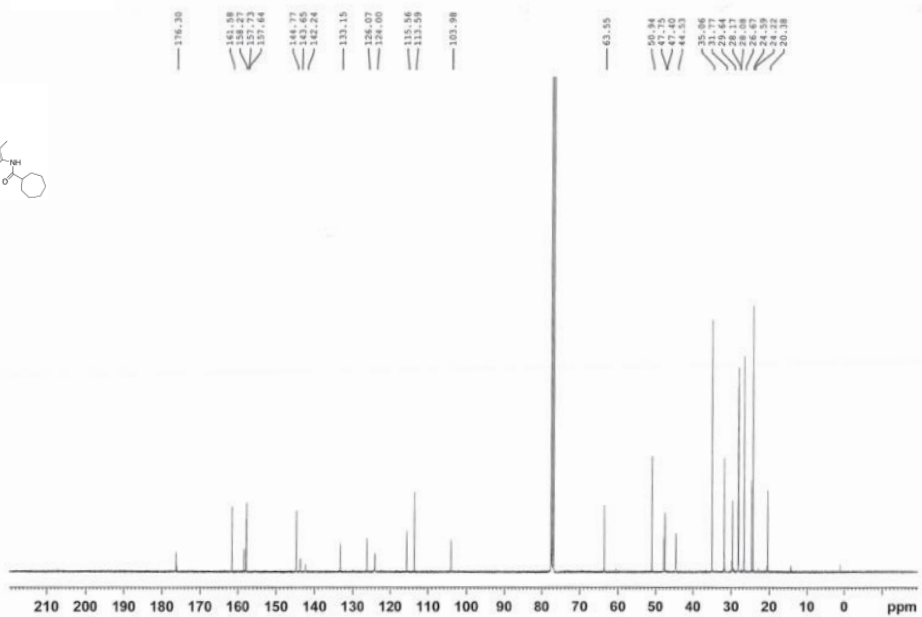

Supplement: jm2c00582_si_001.pdf [file jm2c00582_si_001.pdf]
